# Supplementary material for: Value-based healthcare from a military health system perspective: a systematic review
Source: HighWire-hosted journal article supplement (doi:10.1136/bmjopen-2024-085880), 2024-11-01
Supplement: bmjopen-2024-085880supp003_data_supplement.pdf [file bmjopen-2024-085880supp003_data_supplement.pdf]

Version: 27-02-2024

Supplementary material 3. Databases and search strings

1.1. First databases search executed on 14 March 2022

| Database searched                                          | Platform         | Years of coverage | Records | Records after duplicates removed |
|------------------------------------------------------------|------------------|-------------------|---------|----------------------------------|
| Embase                                                     | Embase.com       | 1971 - Present    | 1872    | 1849                             |
| Medline ALL                                                | Ovid             | 1946 - Present    | 1182    | 300                              |
| Web of Science Core Collection*                            | Web of Knowledge | 1975 - Present    | 1004    | 284                              |
| Cochrane Central Register of Controlled Trials             | Wiley            | 1992 - Present    | 511     | 381                              |
| Additional Search Engines: Google Scholar (200 top-ranked) |                  |                   | 200     | 181                              |
| Total                                                      |                  |                   | 4769    | 2995                             |

\*Science Citation Index Expanded (1975-present) ; Social Sciences Citation Index (1975-present) ; Arts & Humanities Citation Index (1975-present) ; Conference Proceedings Citation Index- Science (1990-present) ; Conference Proceedings Citation Index- Social Science & Humanities (1990-present) ; Emerging Sources Citation Index (2005-present)

1. value-based healthcare
2. military setting

1.2. Second databases search executed on 3 March 2023 – 1<sup>st</sup> update

| Database searched                                          | Platform         | Years of coverage | Records | Records after duplicates removed |
|------------------------------------------------------------|------------------|-------------------|---------|----------------------------------|
| Embase                                                     | Embase.com       | 1971 - Present    | 2053    | 2031                             |
| Medline ALL                                                | Ovid             | 1946 - Present    | 1287    | 324                              |
| Web of Science Core Collection*                            | Web of Knowledge | 1975 - Present    | 1123    | 321                              |
| Cochrane Central Register of Controlled Trials             | Wiley            | 1992 - Present    | 560     | 428                              |
| Additional Search Engines: Google Scholar (200 top-ranked) |                  |                   | 200     | 179                              |
| Total                                                      |                  |                   | 5223    | 3283                             |

\*Science Citation Index Expanded (1975-present) ; Social Sciences Citation Index (1975-present) ; Arts & Humanities Citation Index (1975-present) ; Conference Proceedings Citation Index- Science (1990-present) ; Conference Proceedings Citation Index- Social Science & Humanities (1990-present) ; Emerging Sources Citation Index (2005-present)

Result 2nd databases search: 375 new references

Version: 27-02-2024

1.3. Third databases search executed on 12 February 2024 – 2<sup>nd</sup> update

| Database searched                                             | Platform         | Years of coverage | Records | Records after duplicates removed |
|---------------------------------------------------------------|------------------|-------------------|---------|----------------------------------|
| Medline ALL                                                   | Ovid             | 1946 - Present    | 1396    | 1394                             |
| Embase                                                        | Embase.com       | 1971 - Present    | 2191    | 1135                             |
| Web of Science Core Collection*                               | Web of Knowledge | 1975 - Present    | 1237    | 346                              |
| Cochrane Central Register of Controlled Trials                | Wiley            | 1992 - Present    | 293     | 165                              |
| Additional Search Engines: Google Scholar*** (200 top-ranked) |                  |                   | 200     | 176                              |
| Total                                                         |                  |                   | 5317    | 3216                             |

\*Science Citation Index Expanded (1975-present) ; Social Sciences Citation Index (1975-present) ; Arts & Humanities Citation Index (1975-present) ; Conference Proceedings Citation Index- Science (1990-present) ; Conference Proceedings Citation Index- Social Science & Humanities (1990-present) ; Emerging Sources Citation Index (2005-present)  
\*\*\*Google Scholar was searched via "Publish or Perish" to download the results in EndNote.  
No other database limits were used than those specified in the search strategies

Result 3rd databases search: 343 new references: 343

1.4. Search strings

Embase

('value based health care'/de OR 'value based care'/de OR 'value based medicine'/de OR 'patient-reported outcome'/de OR 'integrated care'/de OR 'integrated health care system'/de OR 'patient care'/mj/de OR (value-based\* OR valuebased\* OR ((value\*) NEXT/3 (based)) OR ((patient\*) NEAR/3 (center\* OR centred\*)) OR ((patient OR self) NEXT/3 (reported) NEAR/3 (outcome\*)) OR ((integrated) NEAR/3 (practice) NEAR/3 (unit\*)) OR ((integrat\*) NEAR/3 (care OR healthcare\* OR delivery)) OR VBHC OR value-driven):ab,ti,kw OR (((high) NEAR/3 (value)) OR patient-care\*):ti) **AND** ('army'/de OR 'military personnel'/exp OR 'military phenomena'/exp OR 'battle injury'/de OR 'military medicine'/de OR 'military health'/de OR (army OR armed-force\* OR military\* OR air-force\* OR navy OR naval OR war OR wartime\* OR warfare\* OR battle OR ((combat) NEAR/3 (related)) OR ((department\* OR ministry OR agency OR force) NEAR/3 (defense OR defence)) OR DARPA OR (soldier\* NOT (soldier-fly\* OR soldier-flies\*)) OR terrorism\* OR terrorist\*):ab,ti,kw,jt OR (defense OR defence):ti) AND [ENGLISH]/lim

Medline

(Patient Reported Outcome Measures/ OR Delivery of Health Care, Integrated/ OR \*Patient Care/ OR (value-based\* OR valuebased\* OR ((value\*) ADJ3 (based)) OR ((patient\*) ADJ3 (center\* OR centred\*)) OR ((patient OR self) ADJ3 (reported) ADJ3 (outcome\*)) OR ((integrated

Version: 27-02-2024

ADJ3 (practice) ADJ3 (unit\*) OR ((integrat\*) ADJ3 (care OR healthcare\* OR delivery)) OR VBHC OR value-driven).ab,ti,kf. OR (((high) ADJ3 (value)) OR patient-care\*).ti.) **AND** (Hospitals, Military/ OR Military Personnel/ OR Military Family/ OR Military Facilities/ OR Psychology, Military/ OR Military Science/ OR Military Psychiatry/ OR Military Nursing/ OR Military Medicine/ OR Military Hygiene/ OR Military Health Services/ OR "Warfare and Armed Conflicts"/ OR Military Health/ OR Combat Disorders/ OR United States Department of Defense/ OR (army OR armed-force\* OR military\* OR air-force\* OR navy OR naval OR war OR wartime\* OR warfare\* OR battle OR ((combat) ADJ3 (related)) OR ((department\* OR ministry OR agency OR force) ADJ3 (defense OR defence)) OR DARPA OR (soldier\* NOT (soldier-fly\* OR soldier-flies\*)) OR terrorism\* OR terrorist\*).ab,ti,kf,jw. OR (defense OR defence).ti.) AND english.la.

### Cochrane

(((value-based\* OR valuebased\* OR ((value\*) NEXT/3 (based)) OR ((patient\*) NEAR/3 (center\* OR centred\*)) OR ((patient OR self) NEXT/3 (reported) NEAR/3 (outcome\*)) OR ((integrated) NEAR/3 (practice) NEAR/3 (unit\*)) OR ((integrat\*) NEAR/3 (care OR healthcare\* OR delivery)) OR VBHC OR value-driven):ab,ti,kw OR (((high) NEAR/3 (value)) OR patient-care\*):ti) **AND** ((army OR armed-force\* OR military\* OR air-force\* OR navy OR naval OR war OR wartime\* OR warfare\* OR battle OR ((combat) NEAR/3 (related)) OR ((department\* OR ministry OR agency OR force) NEAR/3 (defense OR defence)) OR DARPA OR (soldier\* NOT (soldier-fly\* OR soldier-flies\*)) OR terrorism\* OR terrorist\*):ab,ti,kw,so OR (defense OR defence):ti))

### Web of Science

(TS=(((value-based\* OR valuebased\* OR value-driven) NEAR/5 (care OR healthcare\* OR delivery OR medicin\*)) OR ((patient\*) NEAR/2 (center\* OR centred\*)) OR ((patient OR self) NEAR/2 (reported) NEAR/2 (outcome\*)) OR ((integrated) NEAR/2 (practice) NEAR/2 (unit\*)) OR ((integrat\*) NEAR/2 (care OR healthcare\* OR delivery)) OR VBHC) OR TI=(((high) NEAR/2 (value)) OR patient-care\*)) **AND** (TS=(army OR armed-force\* OR military\* OR air-force\* OR navy OR naval OR war OR wartime\* OR warfare\* OR battle OR ((combat) NEAR/2 (related)) OR ((department\* OR ministry OR agency OR force) NEAR/2 (defense OR defence)) OR DARPA OR (soldier\* NOT (soldier-fly\* OR soldier-flies\*)) OR terrorism\* OR terrorist\*) OR SO=(army OR armed-force\* OR military\* OR air-force\* OR navy OR naval OR war OR wartime\* OR warfare\* OR battle OROR DARPA OR (soldier\* NOT (soldier-fly\* OR soldier-flies\*)) OR terrorism\* OR terrorist\*) OR TI=(defense OR defence))

### Google Scholar

"value based|driven care|healthcare|medicine" army|military|airforce|navy|naval|wartime|warfare  
'value based|driven care|healthcare|medicine' army|military|airforce|navy|naval|wartime|warfare
