# Supplementary material for: Value-based healthcare from a military health system perspective: a systematic review
Source: HighWire-hosted journal article supplement (doi:10.1136/bmjopen-2024-085880), 2024-11-01
Supplement: bmjopen-2024-085880supp006_data_supplement.pdf [file bmjopen-2024-085880supp006_data_supplement.pdf]

Version: 20-10-2024

Supplementary material 6. MMAT Screening, using Tool version 2018

Results of MMAT screening of 18 included studies:

| Qualitative studies                  |                                                                               |                                                                                             |                                                         |                                                                           |                                                                                                    |       |
|--------------------------------------|-------------------------------------------------------------------------------|---------------------------------------------------------------------------------------------|---------------------------------------------------------|---------------------------------------------------------------------------|----------------------------------------------------------------------------------------------------|-------|
| Article                              | Questions                                                                     |                                                                                             |                                                         |                                                                           |                                                                                                    |       |
|                                      | 1.1. Is the qualitative approach appropriate to answer the research question? | 1.2. Are the qualitative data collection methods adequate to address the research question? | 1.3. Are the findings adequately derived from the data? | 1.4. Is the interpretation of results sufficiently substantiated by data? | 1.5. Is there coherence between qualitative data sources, collection, analysis and interpretation? | Total |
| ARTICLES - AMPUTATIONS & EXTREMITIES |                                                                               |                                                                                             |                                                         |                                                                           |                                                                                                    |       |
| Stinner, et al. (2016)               | Yes                                                                           | Yes                                                                                         | Yes                                                     | Yes                                                                       | No                                                                                                 | 4/5   |
| ARTICLES - (M)TBI                    |                                                                               |                                                                                             |                                                         |                                                                           |                                                                                                    |       |
| Johnston-Brooks, et al. (2021)       | Yes                                                                           | Yes                                                                                         | No                                                      | Yes                                                                       | No                                                                                                 | 3/5   |
| ARTICLES - OTHER INJURIES            |                                                                               |                                                                                             |                                                         |                                                                           |                                                                                                    |       |
| Wade, et al. (2020)                  | Yes                                                                           | Yes                                                                                         | Yes                                                     | Yes                                                                       | Yes                                                                                                | 5/5   |
| ARTICLES - SYSTEMS                   |                                                                               |                                                                                             |                                                         |                                                                           |                                                                                                    |       |
| Taylor-Clark, et al. (2020)          | Yes                                                                           | Yes                                                                                         | Yes                                                     | Yes                                                                       | Yes                                                                                                | 5/5   |
| Schaettle, et al. (2022)             | Yes                                                                           | Yes                                                                                         | Yes                                                     | No                                                                        | No                                                                                                 | 3/5   |
| Galvin, et al. (2019)                | Yes                                                                           | Yes                                                                                         | Yes                                                     | Yes                                                                       | Yes                                                                                                | 5/5   |

Version: 20-10-2024

| Non-Randomized studies               |                                                                    |                                                                                              |                                       |                                                                    |                                                                                                    |       |
|--------------------------------------|--------------------------------------------------------------------|----------------------------------------------------------------------------------------------|---------------------------------------|--------------------------------------------------------------------|----------------------------------------------------------------------------------------------------|-------|
| Article                              | Questions                                                          |                                                                                              |                                       |                                                                    |                                                                                                    |       |
|                                      | 3.1. Are the participants representative of the target population? | 3.2. Are measurements appropriate regarding both the outcome and intervention (or exposure)? | 3.3. Are there complete outcome data? | 3.4. Are the confounders accounted for in the design and analysis? | 3.5. During the study period, is the intervention administered (or exposure occurred) as intended? | Total |
| ARTICLES - AMPUTATIONS & EXTREMITIES |                                                                    |                                                                                              |                                       |                                                                    |                                                                                                    |       |
| Eskridge, et al. (2019)              | Yes                                                                | Yes                                                                                          | Yes                                   | No                                                                 | Yes                                                                                                | 4/5   |
| Perkins, et al. (2018)               | Yes                                                                | Yes                                                                                          | No                                    | Yes                                                                | Yes                                                                                                | 4/5   |
| Scott, et al. (2014)                 | Yes                                                                | Yes                                                                                          | Yes                                   | Yes                                                                | Yes                                                                                                | 5/5   |
| Eskridge, et al. (2020)              | Yes                                                                | Yes                                                                                          | Yes                                   | Yes                                                                | Yes                                                                                                | 5/5   |
| Eskridge, et al. (2022)              | Yes                                                                | Yes                                                                                          | Yes                                   | Yes                                                                | Yes                                                                                                | 5/5   |
| ARTICLES - (M)TBI                    |                                                                    |                                                                                              |                                       |                                                                    |                                                                                                    |       |
| Bolzenius, et al. (2015)             | Yes                                                                | Yes                                                                                          | Yes                                   | Yes                                                                | Yes                                                                                                | 5/5   |
| MacGregor, et al. (2023)             | Yes                                                                | Yes                                                                                          | No                                    | Yes                                                                | Yes                                                                                                | 4/5   |
| ARTICLES - MULTIPLE TRAUMA'S         |                                                                    |                                                                                              |                                       |                                                                    |                                                                                                    |       |
| MacGregor, et al. (2021)             | Yes                                                                | Yes                                                                                          | Yes                                   | Yes                                                                | Yes                                                                                                | 5/5   |
| Hawari, et al. (2021)                | Yes                                                                | Yes                                                                                          | Yes                                   | Yes                                                                | Yes                                                                                                | 5/5   |
| MacGregor, et al. (2021)             | Yes                                                                | Yes                                                                                          | Yes                                   | Yes                                                                | Yes                                                                                                | 5/5   |
| MacGregor, et al. (2020)             | Yes                                                                | Yes                                                                                          | Yes                                   | No                                                                 | Yes                                                                                                | 4/5   |
| ARTICLES - OTHER INJURIES            |                                                                    |                                                                                              |                                       |                                                                    |                                                                                                    |       |
| Hines, et al. (2022)                 | Yes                                                                | Yes                                                                                          | Yes                                   | Yes                                                                | Yes                                                                                                | 5/5   |
